# Supplementary material for: Meta-analysis of genome-wide associations and polygenic risk prediction for atrial fibrillation in more than 180,000 cases
Source: Springer Nature journal article supplement (doi:10.1038/s41588-024-02072-3), 2025-03-01
Supplement: MOESM1 [file 41588_2024_2072_MOESM1_ESM.pdf › 41588_2024_2072_MOESM1_ESM.pdf]

# Meta-analysis of genome-wide associations and polygenic risk prediction for atrial fibrillation in more than 180,000 cases

---

In the format provided by the  
authors and unedited

## Supplementary Notes

### Supplementary Results

#### Exploratory analysis of low frequency variants

In an exploratory analysis of low frequency variants with MAF < 1% we identified 14 genetic loci (**Figure 1, Supplementary Table 6**). We observed stronger effects (OR range: 1.22 – 4.30) at these low frequency lead variants compared to common lead variants (**Extended Data Figure 1C**). To ensure that low frequency variant associations were not driven by poor genotyping or imputation, we attempted to validate these low frequency variant associations using whole exome sequencing (WES) and whole genome sequencing (WGS) of partially overlapping study cohorts<sup>1</sup>. We could test 11 loci and saw consistent directionality for 10 of them, 5 reached nominal significance (**Supplementary Table 7**). The genetic locus with the largest OR among the rare variants (OR range: 3.01 – 4.30) was close to the genes *NEURL1/SH3PXD2A*. This association was strongest in individuals of East Asian ancestry. Another genetic locus in the Icelandic population on chromosome 11 was tagging the known founder mutation rs397516082 (c.927-2A>G) in the gene *MYPBC3* ( $R^2 > 0.64$ ) that has shown to be associated with hypertrophic cardiomyopathy<sup>2</sup>. As anticipated, there was an inverse correlation between minor allele frequency and AF risk (**Extended Data Figure 1D**).

#### Ancestry specific loci

We then examined the association results for the eight ancestry groups (**Supplementary Tables 2, 4 and 6**). Seven of the common lead variants and three of the low frequency lead variants showed significant heterogeneity of effect estimates by ancestry. A small subset of common lead variants was present in only one of the ancestries. For example, the lead variant rs181513970 was observed in only the FIN ancestry group (closest gene = *POLD1*, OR = 1.44, P-value =  $4.27 \times 10^{-10}$ ), and the variant rs112538624 near *NOL12* was observed in the AdmAFR ancestry group (OR = 2.4, P-value =  $4.47 \times 10^{-08}$ ). Of note, the association at rs112538624 was

only derived from one cohort ( $N_{AF} = 414$ ), and could be a false positive. A replication analysis was not performed due to lack of access to additional samples from this ancestry group.

### Results from MAGMA, PoPS, eQTL, snRNA and coding variation

The region-based method MAGMA (Multi-marker Analysis of GenoMic Annotation) identified 569 genes with  $P$ -value  $< 2.76 \times 10^{-6}$  at AF GWAS loci (**Supplementary Table 8**). The top 3 genes with the lowest MAGMA  $P$ -values were *SH3PXD2A*, *AKAP6* and *ZFHX3*. The similarity-based method PoPs (Polygenic Priority score) incorporates the results from MAGMA and scores genes based on shared annotated traits. **Extended Data Figure 2** shows the distribution of the PoPs-score across all genes and the cutoff based on  $> 3$  standard deviations from the mean that we used to define a high PoPs score. The top 3 genes with the highest PoPs-score were *MYOCD*, *TTN*, and *NKX2-5* (**Supplementary Table 9**).

Next, we sought to integrate the AF GWAS results with single-nuclei and bulk RNA-sequencing transcriptional profiles. First, we evaluated the GWAS results globally leveraging recently emerging single-nuclei transcriptomics data from the healthy human heart<sup>3</sup>. Using LD-score regression we observe the strongest enrichment of AF GWAS heritability near genes upregulated in left atrial cardiomyocytes relative to right atrium, right ventricle, and left ventricle cardiomyocytes (**Extended Data Figure 3A**). Examination of the dedicated cell-types in the left atrial tissue demonstrated that genes expressed in cardiomyocytes were enriched at our AF GWAS loci (**Extended Data Figure 3B** and **Supplementary Table 12**). Second, the sentinel variants were intersected with expression quantitative trait loci (eQTL) from cardiac tissues (GTEx: atrial appendage, left ventricle, MAGNET: left atrium), showing that 142 lead variants were eQTLs (**Supplementary Tables 10** and **11**).

We then investigated the predicted functional consequence of all AF-associated variants located in the protein coding regions of the genome. Four AF variants were predicted to have a high impact via the annotation from the Variant Effect Predictor tool (VEP)<sup>4</sup>, in the genes *RPL3L* (c.1167+1G>A), *PPFIA4* (p.Pro585AlafsTer6), *PTGES3* (c.2\_3insAT) and *GSDMB* (c.662-2A>G) (**Supplementary Table 13**). In *RPL3L*, rs140192228 was predicted to introduce a splice site variant in the gene, a mutation that has previously been reported for AF in a meta-analysis

including deCODE and the UK Biobank<sup>5</sup>. Additional 159 common variants and 6 low frequency missense variants were predicted to have moderate impact on gene function. The largest number of missense variants (N = 25) was found in gene *TTN*, a large structural protein in cardiomyocytes, that has been previously implicated in AF<sup>6,7</sup>. A total of 47 genes harbored a genome-wide significant missense mutation (**Supplementary Table 14**).

### **Comparison of GenePrio and OpenTargets L2G**

Linking causal genes from variants identified in GWAS remains an open challenge in the field. The GenePrio algorithm serves as a heuristic method to prioritize candidate genes based on five lines of evidence. It was not benchmarked against gold standard sets of genes (as gold standards are not straightforward to derive). We also note that GenePrio already incorporates many data sources used in other strategies of prioritization, including a complete prioritization algorithm in and of itself (the Polygenic Priority Score (PoPS)). Nonetheless, we sought to compare the selection of genes from GenePrio to another contemporary approach, namely OpenTargets locus to gene (L2G) model. The OpenTargets L2G model uses features such as variant pathogenicity, colocalization of molecular QTLs, gene distance from credible set variants, and chromatin interactions. GenePrio uses similar features to this method, but unlike the OpenTargets L2G model, GenePrio focuses specifically on the most relevant tissues for eQTLs and cell type specific expression based on *a priori* knowledge of the disease.

To compare GenePrio to the OpenTargets L2G prioritization model, we extracted the L2G results from OpenTargets for the GWAS from Roselli et al., 2018 as these results are provided with open access by OpenTargets. We then applied our GenePrio approach to these GWAS results and compared the two gene prioritization strategies. In total, 101 loci are included in the OpenTargets L2G model from this GWAS, and of these, OpenTargets L2G prioritizes one or more genes at 77 (76.2%) loci. Conversely, GenePrio only prioritized genes at 52 (51.4%) loci, a notably more conservative approach. Notably, 42 of the 101 loci have at least one gene prioritized in both methods, of which 36 (85.7%) have the same gene prioritized, suggesting

these methods converge to similar prioritization results. The specific breakdown of loci are as follows:

**Prioritized only by GenePrio (n=10):**

*XPO1, REEP1, ACVR2A, TTN, FAM13B, ATXN1, GPR22, NACA, RPL3L, CHRNA1*

**Prioritized only by OpenTargets L2G (n=35):**

*GJA5, NUCKS1, KIF3C, MXD1, CAND2, THRB, EPHA3, PHLDB2, GNB4, ARHGAP10, KDM1B, SMIM29, SUN1, DGKB, CREB5, (MTSS1, ZNF572, SQLE)\*, ZFAT, PTK2, MLLT3, APOE, ZNF462, LRMDA, NEURL1, SORL1, SOX5, TBX3, (ESR2, SYNE2)\*, IRF2BPL, TLE3, HCN4, ARNT2, KCNJ2, SMAD7, GATA5, CLIC6*

**Prioritized concordantly by both OpenTargets L2G and GenePrio (n=36):**

*CASZ1, KCND3, CASQ2, METTL11B, PRRX1, PPFIA4, CEP68, WIPF1, SPATS2L, WDR1, PITX2, CAMK2D, HAND2, KCNN2, NR3C1, NKX2-5, CDKN1A, EYA4, CAV1, KCNH2, ASAH1, FBXO32, PSMB7, SYNPO2L, KCNJ5, SSPN, PKP2, BEST3, TBX5, CCDC92, AKAP6, CFL2, IGF1R, ZFHX3, MYOCD, MAPT*

**Prioritized discordantly by OpenTargets L2G and GenePrio (n=6, formatted as**

**GenePrio:OpenTargets L2G):**

*SCN5A:SCN10A, SLC25A26:LRIG1, UBE2D3:SLC9B1, PLN:SLC35F1, GTF2IRD2:GTF2I, MYH6:MYH7*

\*Note: Multiple genes prioritized by OpenTargets L2G at these loci.

## Study descriptions

The following studies have previously been described: ARIC<sup>8</sup>, BBJ<sup>9</sup>, deCODE<sup>10</sup>, DiscovEHR<sup>10</sup>, FHS<sup>8</sup>, HUNT<sup>10</sup>, KAFN<sup>11</sup>, MESA<sup>6</sup>, MGI<sup>10</sup>, MGH CAMP<sup>6</sup>, PHB<sup>12</sup>, SiGN<sup>13</sup>, SPHFC<sup>6</sup>, UKBB<sup>14</sup> and WGHS<sup>8</sup>.

**GAPP, BEAT-AF and Swiss-AF Cohorts (GAPPBEATSWISS):** The study Genetic and Phenotypic Determinants of Blood Pressure and Other Cardiovascular Risk Factors (GAPP) is population based, including inhabitants of the Principality of Liechtenstein between the ages of 25 to 41<sup>15</sup>. Participants free of AF from the GAPP study were used as controls in this analysis.

The Basel atrial fibrillation cohort (BEAT-AF) study is a prospective study among patients with AF across multiple centers. Swiss-AF is a prospective multicenter cohort study in Switzerland including AF patients > 65 years.

**Broad CardioVascular Disease initiative study (Broad CVDi Study):** The Broad CVDi study is an extension of the Broad AF study. It is a multi-study case control collection at the Broad institute focused on cardiovascular diseases including atrial fibrillation, mitral valve prolapse, Atrioventricular nodal reentrant tachycardia (AVNRT), Supraventricular tachycardia (SVT) and Bradyarrhythmia. The DNA for each sample was imported to the Broad and jointly genotyped on the Infinium PsychArray-24 v1.2 array. The genotyping approach, QC and imputation have previously been described<sup>12</sup>. Over 35,000 participants were contributed to this collection with an average case control mix of 2:1. Participants that were collected as cases for cardiac traits or diseases other than AF were excluded for this analysis. 91% of the participants in the Broad CVDi study were of European ancestry, 3% of African American ancestry, 2% from Brazil. Individual studies contributing to this AF case control analysis were: AFCT, AFLMU, Australian Familial AF Study, BioVU, CVBio, Duke, EAST AFNET4, GENAF, German Heart Center Controls, GerMIFS, GGAF, Hopkins, HVH, Intermountain, MGH AF, MGH DOFEGEN, MGH MVP, MGH Stroke, MPP AF, MPP Echo, Penn, PHB, TCAI, UCSF, UMass and VAFAR. These studies have previously been described<sup>12</sup>.

### **The Copenhagen Hospital Biobank Cardiovascular Study and the Danish Blood Donor Study**

**(CHB-CVS DBDS):** This study is part of the study: "Genetics of cardiovascular disease" – a genome-wide association study on repository samples from CHB - the CHB-CVS study. CHB has previously been described<sup>16</sup>. CHB-CVS is a genetic study on patients from CHB with cardiovascular diseases identified through the Danish National Patient Registry (NPR). CHB-CVS is approved by the National Committee on Health Research Ethics (NVC 1708829) and the Danish Data Protection Agency (P-2019-93). DBDS is a prospective cohort and biobank study on general health among blood donors. DBDS has been genotyped by deCODE Genetics<sup>17</sup>. The current work includes 659 cases with AF and 36,475 healthy controls. Phenotypes were identified through NPR. The genetic studies within DBDS is approved by the National Committee on Health Research Ethics (NVC 1700407) and the Data Protection Agency (P-2019-99).

**ENGAGE AF-TIMI 48 (TIMI 48):** TIMI 48 was a 3-arm randomized, double-blind, double-dummy trial of 21,105 participants<sup>18</sup>. The trial compares two doses of edoxaban to placebo. Enrollment criteria were presence of atrial fibrillation requiring anticoagulation. Participants of the trial had the following comorbidities, diabetes (38%), stroke/TIA (28%), and congestive heart failure (57%). Phenotypes were adjudicated by physicians based on patient interview and medical record/imaging review.

**FinnGen:** FinnGen is a public-private partnership across Finnish universities, hospitals, biobanks and pharmaceutical companies. It aims at completing genotyping for genome-wide association studies for all included samples, and utilizes extensive registry data that is available on all Finns<sup>19</sup>. This study includes results from the release R4, that was released to the public in Q4 2020 and includes 176,899 samples (<https://finngen.gitbook.io/documentation/v/r4/>).

**FOURIER (TIMI 59):** Was a multinational, randomized, double-blind, placebo-controlled trial of 27,564 participants<sup>20</sup>. The trial compared the PCSK9 inhibitor evolocumab in patients with myocardial infarction, stroke, or peripheral artery disease (PAD). Participants of the trial had the

following comorbidities, hypertension (80%), diabetes (37%), and prior myocardial infarction (81%). Phenotypes were adjudicated by physicians based on patient interview and medical record/imaging review.

**The Health and Retirement Study (HRS):** The HRS study<sup>21</sup> is a longitudinal survey of a representative sample of Americans over the age of 50. The current sample is over 26,000 persons in 17,000 households. The study interviews respondents every two years about income and wealth, health and use of health services, work and retirement, and family connections. DNA was extracted from saliva collected during a face-to-face interview in the respondents' homes. These data represent respondents who provided DNA samples and signed consent forms in 2006, 2008, 2010, and 2012. Prevalent AF at time of DNA draw as determined by Medicare Claims (Medicare linkage and three years of Part A&B FFS coverage immediately prior to DNA draw). Cases: requires 1 IP claim or 2 OP/PB claims in 1-year period. Controls: no AF in claims prior to DNA draw.

**PEGASUS (TIMI 54):** Was a multinational, randomized, double-blind, placebo-controlled trial of 21,162 participants<sup>22</sup>. It studied the efficacy of ticagrelor in stable ischemic heart disease. Participants in the trial presented with prior myocardial infarction. Participants of the trial had the following comorbidities, smoking (17%), hypertension (78%), diabetes (32%), prior PCI (83%), and prior CABG (60%). Phenotypes were adjudicated by physicians based on patient interview and medical record/imaging review.

**SAVOR (TIMI 53):** Was a multinational, randomized, double-blind, placebo-controlled trial of 16,492 participants<sup>23</sup>. Saxagliptin was randomized to placebo in diabetics. Participants of the trial had the following comorbidities, atherosclerosis (78%), HTN (81%), and heart failure (13%). Phenotypes were adjudicated by physicians based on patient interview and medical record/imaging review.



**SOLID (TIMI 52):** Was a multinational, randomized, double-blind, placebo-controlled trial of 13 026 participants, that randomized darapladib<sup>24</sup>. Darapladib was a selective inhibitor of Lp-PLA2 enzyme in patients within 30 days of acute coronary syndrome. The acute coronary syndrome events were ST-elevation myocardial infarction (45% of patients), non–ST-elevation myocardial infarction (43% of patients), and unstable angina (12% of patients). Participants of the trial had the following comorbidities, hypertension (73%), diabetes (35%), and prior MI (31%). Phenotypes were adjudicated by physicians based on patient interview and medical record/imaging review.

## **Acknowledgements**

**AGES:** The Age, Gene/Environment Susceptibility-Reykjavik Study was supported by NIH contracts N01-AG-1-2100 and HHSN27120120022C, the NIA Intramural Research Program, Hjartavernd (the Icelandic Heart Association), and the Althingi (the Icelandic Parliament).

**ARIC:** The Atherosclerosis Risk in Communities study has been funded in whole or in part with Federal funds from the National Heart, Lung, and Blood Institute, National Institutes of Health, Department of Health and Human Services, under Contract nos. (HHSN268201700001I, HHSN268201700002I, HHSN268201700003I, HHSN268201700004I, HHSN268201700005I). Funding was also supported by R01HL087641, R01HL059367 and R01HL086694; National Human Genome Research Institute contract U01HG004402; and National Institutes of Health contract HHSN268200625226C. Infrastructure was partly supported by Grant Number UL1RR025005, a component of the National Institutes of Health and NIH Roadmap for Medical Research. The authors thank the staff and participants of the ARIC study for their important contributions. A.A. is supported by NIH/NHLBI K24HL148521, 16EIA26410001 (AHA).

**Australian Familial AF Study:** D.F. is supported by NSW Health; Heart Foundation.

**BBJ:** The Biobank Japan was supported by the Tailor-Made Medical Treatment Program of the Ministry of Education, Culture, Sports, Science, and Technology and Japan Agency for Medical Research (AMED) under Grant Numbers JP17km0305001, JP17km0305002, JP20km0405209

(the GRIFIN project) and JP20ek0109487. K.I. was funded by the Japan Agency for Medical Research and Development (nos. JP22ek0210164, JP21tm0724601, JP20km0405209 and JP20ek0109487) and the Japan Society for the Promotion of Science(a Grant-in-Aid for Scientific Research(B)). K.M. is funded by the Japan Society for the Promotion of Science and MSD Life Science Foundation and was funded by AMED under Grant Numbers JP20km0405209 (the GRIFIN project) and JP20ek0109487. I.K. was funded by Japan Agency for Medical Research (AMED) under Grant Numbers JP20km0405209 (the GRIFIN project) and JP20ek0109487.

**BioMe:** The Mount Sinai BioMe Biobank has been supported by The Andrea and Charles Bronfman Philanthropies and in part by Federal funds from the NHLBI and NHGRI (U01HG00638001; U01HG007417; X01HL134588). We thank all participants in the Mount Sinai Biobank. We also thank all our recruiters who have assisted and continue to assist in data collection and management and are grateful for the computational resources and staff expertise provided by Scientific Computing at the Icahn School of Medicine at Mount Sinai.

**Broad CVDi Study:** The Broad Cardiovascular Disease Initiative Study was funded as part of a collaboration between the Broad Institute and Bayer AG.

**CCAF:** J.B. and M.K.C. are supported by NIH R01 HL090620, HL111314, HL158071, P01 HL158502; American Heart Association 18SFRN34110067; the NIH National Center for Research Resources for Case Western Reserve University and Cleveland Clinic Clinical and Translational

Science Award UL1-RR024989, the Cleveland Clinic Department of Cardiovascular Medicine philanthropy research funds, and the Tomsich Atrial Fibrillation Research Fund.

**CHB-CVD DBDS:** M.S.O. was supported by The John and Birthe Meyer Foundation, The Research Foundation at Rigshospitalet, Villadsen Family Foundation, and the Hallas-Møller Emerging Investigator Novo Nordisk (NNF17OC0031204). J.G. was funded by BRIDGE - Translational Excellence Programme (NNF20SA0064340). H.B.U. was supported by the Innovation Fund Denmark (PM Heart), NordForsk and the Capital Regions Research Council (No. A5920).

**CHS:** B.M.P. is supported by Contracts HHSN268201200036C, HHSN268200800007C, HHSN268201800001C, N01HC55222, N01HC85079, N01HC85080, N01HC85081, N01HC85082, N01HC85083, N01HC85086, 75N92021D00006, and grants U01HL080295, HL105756, and U01HL130114 from the National Heart, Lung, and Blood Institute (NHLBI), with additional contribution from the National Institute of Neurological Disorders and Stroke (NINDS). Additional support was provided by R01AG023629 from the National Institute on Aging (NIA). A full list of principal CHS investigators and institutions can be found at [CHS-NHLBI.org](http://CHS-NHLBI.org). The content is solely the responsibility of the authors and does not necessarily represent the official views of the National Institutes of Health.

**EAST AFNET4:** T.Z. is funded by the German Research Foundation, the EU Horizon 2020 programme, the EU ERANet and ERAPreMed Programmes, the German Centre for

Cardiovascular Research (DZHK, 81Z0710102) and the German Ministry of Education and Research.

**EGCUT:** EGCUT study was funded by Estonian Research Grant PRG1291.

**FHS:** This research has been supported by grant number 75N92019D00031. E.J.Benjamin is supported by R01HL092577; American Heart Association AF AHA\_18SFRN34110082. H.L. is supported by R01 HL092577. K.L. is supported by R01 HL092577, AHA SFRN34230127. B.W. is supported by R01 HL092577.

**FinnGen:** We want to acknowledge the participants and investigators of the FinnGen study. J.T.R is supported by a fellowship from the Sigrid Jusélius Foundation.

**GAPPBEATSWISS:** The Swiss-AF study is supported by grants of the Swiss National Science Foundation (Grant numbers 33CS30\_148474, 33CS30\_177520, 32473B\_176178, 32003B\_197524). S.T. is supported by a Junior Clinical Research Scholar award from the Fonds de Recherche du Québec-Santé (FRQS).

**GENAF:** The GENAF study is funded by the Norwegian Research Council with a mobility grant (240149) and young research talent grant (287086); the South-Eastern Health Authorities with a PhD-grant (2019122); Vestre Viken Hospital Trust with a PhD-grant; afib.no - the Norwegian Atrial Fibrillation Research Network; "Indremedisinsk Forskningsfond" at Bærum Hospital.

**GS:SFHS:** Generation Scotland received core support from the Chief Scientist Office of the Scottish Government Health Directorates [CZD/16/6] and the Scottish Funding Council [HR03006] and is currently supported by the Wellcome Trust [216767/Z/19/Z]. Genotyping of the GS:SFHS samples was carried out by the Genetics Core Laboratory at the Edinburgh Clinical Research Facility, University of Edinburgh, Scotland and was funded by the Medical Research Council UK and the Wellcome Trust (Wellcome Trust Strategic Award “STratifying Resilience and Depression Longitudinally” (STRADL) Reference 104036/Z/14/Z). We are grateful to all the families who took part, the general practitioners and the Scottish School of Primary Care for their help in recruiting them, and the whole Generation Scotland team, which includes interviewers, computer and laboratory technicians, clerical workers, research scientists, volunteers, managers, receptionists, healthcare assistants and nurses. C. Hayward was supported by an MRC Human Genetics Unit programme grant ‘Quantitative traits in health and disease’ (U. MC\_UU\_00007/10).

**GerMIFS:** The GerMIFS was funded by German Federal Ministries: ERA-NET (Druggable-MI-genes: 01KL1802), (BlockCAD: 16GW0198K), (AbCD-Net: 01ZX1706C), and ModulMax (grant No: ZF4590201BA8). HS is a Co-applicant of the British Heart Foundation (BHF)/German Centre of Cardiovascular Research (DZHK)-collaboration (DZHK-BHF: 81X2600522) and the Leducq Foundation for Cardiovascular Research (PlaQOmics: 18CVD02). Further support has been received from the German Research Foundation (DFG): SFB 1123 (B02) and SFB TRR 267 (B05)

and the Bavarian State Ministry of Health and Care (DigiMed Bayern (grant No: DMB-1805-0001)).

**HVH:** The Heart and Vascular Health study is supported by grants HL068986, HL085251, HL095080, and HL073410 from the National Heart, Lung, and Blood Institute.

**HRS:** HRS is supported by the National Institute on Aging (NIA U01AG009740). The genotyping was funded separately by the National Institute on Aging (RC2 AG036495, RC4 AG039029). Our genotyping was conducted by the NIH Center for Inherited Disease Research (CIDR) at Johns Hopkins University. Genotyping quality control and final preparation of the data were performed by the Genetics Coordinating Center at the University of Washington and the School of Public Health at the University of Michigan.

**Intermountain:** M.J.C. was supported by funding from the Dell Loy Hansen Heart Foundation.

**LURIC:** LURIC was supported by the 7th Framework Programs Atheroremo (grant Agreement number 201668) and RiskyCAD (grant agreement number 305739) of the European Union and the H2020 Program TO\_AITION (grant agreement number 848146) of the European Union. The work of WM and MK was supported as part of the Competence Cluster of Nutrition and Cardiovascular Health (nutriCARD) which was funded by the German Federal Ministry of Education and Research.

**MESA:** MESA and the MESA SHARe projects are conducted and supported by the National Heart, Lung, and Blood Institute (NHLBI) in collaboration with MESA investigators. Support for MESA is provided by contracts 75N92020D00001, HHSN268201500003I, N01-HC-95159, 75N92020D00005, N01-HC-95160, 75N92020D00002, N01-HC-95161, 75N92020D00003, N01-HC-95162, 75N92020D00006, N01-HC-95163, 75N92020D00004, N01-HC-95164, 75N92020D00007, N01-HC-95165, N01-HC-95166, N01-HC-95167, N01-HC-95168, N01-HC-95169, UL1-TR-000040, UL1-TR-001079, and UL1-TR-001420, UL1TR001881, DK063491, and R01HL105756. Funding for SHARe genotyping was provided by NHLBI Contract N02-HL-64278. Genotyping was performed at Affymetrix (Santa Clara, California, USA) and the Broad Institute of Harvard and MIT (Boston, Massachusetts, USA) using the Affymetrix Genome-Wide Human SNP Array 6.0. The authors thank the other investigators, the staff, and the participants of the MESA study for their valuable contributions. A full list of participating MESA investigators and institutes can be found at <http://www.mesa-nhlbi.org>.

**MGH:** L.X. is supported by American Heart Association 20CDA35260081. J.P.P. is supported by NIH K08HL159346 and by a Sarnoff Cardiovascular Research Foundation Scholar Award. P.T.E. is supported by grants from the National Institutes of Health (1R01HL092577, 1R01HL157635, 5R01HL139731), from the American Heart Association Strategically Focused Research Networks (18SFRN34110082), and from the European Union (MAESTRIA 965286).

**MGI:** S.K.G. is supported by grant R35HL161016.



**MDCS:** The Swedish Heart-Lung Foundation (2019-0526), the Swedish Research Council (2021-02273), the European Research Council (ERC-STG-2015-679242), Gothenburg University, Skåne University Hospital, governmental funding of clinical research within the Swedish National Health Service, a generous donation from the Knut and Alice Wallenberg foundation to the Wallenberg Center for Molecular Medicine in Lund, and funding from the Swedish Research Council (Linnaeus grant Dnr 349-2006-237, Strategic Research Area Exodiab Dnr 2009-1039) and Swedish Foundation for Strategic Research (Dnr IRC15-0067) to the Lund University Diabetes Center.

**Partners:** L-C.W. is supported by National Institutes of Health (NIH) grant 1R01HL139731 and American Heart Association (AHA) Postdoctoral Fellowship 18SFRN34110082. S.A.L. is supported by NIH grant 1R01HL139731 and American Heart Association 18SFRN34250007.

**PMBB:** S.M.D. is supported by IK2-CX001780. This publication does not represent the views of the Department of Veterans Affairs or the United States Government.

**Rotterdam Study:** The generation and management of GWAS genotype data for the Rotterdam Study (RS I, RS II, RS III) was executed by the Human Genotyping Facility of the Genetic Laboratory of the Department of Internal Medicine, Erasmus MC, Rotterdam, The Netherlands. The GWAS datasets are supported by the Netherlands Organisation of Scientific Research NWO Investments (nr. 175.010.2005.011, 911-03-012), the Genetic Laboratory of the Department of Internal Medicine, Erasmus MC, the Research Institute for Diseases in the Elderly (014-93-015;

RIDE2), the Netherlands Genomics Initiative (NGI)/Netherlands Organisation for Scientific Research (NWO) Netherlands Consortium for Healthy Aging (NCHA), project nr. 050-060-810. We thank Pascal Arp, Mila Jhamai, Marijn Verkerk, Lizbeth Herrera and Marjolein Peters, MSc, and Carolina Medina-Gomez, MSc, for their help in creating the GWAS database, and Karol Estrada, PhD, Yurii Aulchenko, PhD, and Carolina Medina-Gomez, MSc, for the creation and analysis of imputed data. The Rotterdam Study is funded by Erasmus Medical Center and Erasmus University, Rotterdam, Netherlands Organization for the Health Research and Development (ZonMw), the Research Institute for Diseases in the Elderly (RIDE), the Ministry of Education, Culture and Science, the Ministry for Health, Welfare and Sports, the European Commission (DG XII), and the Municipality of Rotterdam. The authors are grateful to the study participants, the staff from the Rotterdam Study and the participating general practitioners and pharmacists.

**SHIP:** SHIP is part of the Community Medicine Research net of the University of Greifswald, Germany, which is funded by the Federal Ministry of Education and Research (grants no. 01ZZ9603, 01ZZ0103, and 01ZZ0403), the Ministry of Cultural Affairs as well as the Social Ministry of the Federal State of Mecklenburg-West Pomerania, and the network 'Greifswald Approach to Individualized Medicine (GANI\_MED)' funded by the Federal Ministry of Education and Research (grant 03IS2061A). Genome-wide data have been supported by the Federal Ministry of Education and Research (grant no. 03ZIK012) and a joint grant from Siemens Healthcare, Erlangen, Germany and the Federal State of Mecklenburg- West Pomerania.

**SiGN:** The Stroke Genetics Network (SiGN) study was funded by a cooperative agreement grant from the National Institute of Neurological Disorders and Stroke (NINDS) U01 NS069208. Genotyping services were provided by the Johns Hopkins University Center for Inherited Disease Research (CIDR), which is fully funded through a federal contract from the National Institutes of Health (NIH) to the Johns Hopkins University (contract No.HHSN268200782096C). The Biostatistics Department Genetics Coordinating Center at the University of Washington (Seattle) provided more extensive quality control of the genotype data through a subcontract with CIDR. Additional support to the Administrative Core of SiGN was provided by the Dean's Office, University of Maryland School of Medicine. Formal acknowledgement of the many contributing SiGN case and control datasets can be found in the original publication (PMID: 26708676). C.D.A. is supported by NIH (R01NS103924, U01NS069763), the American Heart Association (18SFRN34250007), and the AHA-Bugher Foundation (21SFRN812095).

**TIMI group:** The TIMI Study Group has received institutional research grant support through Brigham and Women's Hospital from Abbott, Amgen, Anthos Therapeutics, ARCA Biopharma, Inc., AstraZeneca, Daiichi-Sankyo, Eisai, Intarcia, Ionis Pharmaceuticals, Inc., MedImmune, Merck, Novartis, Pfizer, Regeneron Pharmaceuticals, Inc., Roche, The Medicines Company, Zora Biosciences.

**TWINGENE:** The Swedish Twin Registry is managed by Karolinska Institutet and receives funding through the Swedish Research Council under the grant no 2017-00641.

**UKBB:** S.H.C. is supported by the BioData Catalyst fellowship program.

**WGHS:** C.M.A. is supported by R01HL116690.

Support for title page creation and format was provided by AuthorArranger, a tool developed at the [National Cancer Institute](#).

## **Regeneron Genetics Center Banner Author List and Contribution Statements**

### **RGC Management and Leadership Team**

Goncalo Abecasis, D.Phil. , Aris Baras, M.D. , Michael Cantor, M.D. , Giovanni Coppola, M.D. , Andrew Deubler , Aris Economides, Ph.D. , Katia Karalis, Ph.D. , Luca A. Lotta, M.D., Ph.D. , John D. Overton, Ph.D. , Jeffrey G. Reid, Ph.D. , Katherine Siminovitch, M.D. , Alan Shuldiner, M.D.

### **Sequencing and Lab Operations**

Christina Beechert , Caitlin Forsythe, M.S. , Erin D. Fuller , Zhenhua Gu, M.S. , Michael Lattari , Alexander Lopez, M.S., Kia Manoochehri, B.S. , John D. Overton, Ph.D. , Maria Sotiropoulos Padilla, M.S. , Manasi Pradhan, M.S., Ricardo Schiavo, B.S., Chenggu Wang, B.S., Louis Widom , Sarah E. Wolf, M.S.

### **Clinical Informatics**

Amelia Averitt, Ph.D. , Nilanjana Banerjee, Ph.D. , Michael Cantor, M.D. , Dadong Li, Ph.D. , Sameer Malhotra, M.D. , Deepika Sharma, MHI , Jeffrey Staples , Ph.D.

### **Genome Informatics**

Xiaodong Bai, Ph.D. , Suganthi Balasubramanian, Ph.D. , Suying Bao, Ph.D. , Boris Boutkov, Ph.D., Siying Chen, Ph.D. , Gisu Eom, B.S. , Lukas Habegger, Ph.D. , Alicia Hawes, B.S. , Olga Krasheninina, M.S. , Rouel Lanche, B.S. , Adam J. Mansfield, B.A. , Evan K. Maxwell, Ph.D. , George Mitra, B.A. , Mona Nafde, M.S. , Sean O’Keeffe, Ph.D. , Max Orelus, B.B.A. , Razvan Panea, Ph.D. , Tommy Polanco, B.A. , Ayesha Rasool, M.S. , Jeffrey G. Reid, Ph.D. , William Salerno, Ph.D. , Jeffrey C. Staples, Ph.D. , Kathie Sun, Ph.D. , Jiwen Xin, Ph.D.

### **Analytical Genomics and Data Science**

Goncalo Abecasis, D.Phil. , Joshua Backman, Ph.D. , Amy Damask, Ph.D. , Lee Dobbryn, Ph.D. , Manuel Allen Revez Ferreira, Ph.D. , Arkopravo Ghosh, M.S. , Christopher Gillies, Ph.D. , Lauren Gurski, B.S. , Eric Jorgenson, Ph.D. , Hyun Min Kang, Ph.D. , Michael Kessler, Ph.D. , Jack

Kosmicki, Ph.D. , Alexander Li , Ph.D. , Nan Lin, Ph.D. , Daren Liu, M.S. , Adam Locke, Ph.D. , Jonathan Marchini, Ph.D. , Anthony Marcketta, M.S. , Joelle Mbatchou, Ph.D. , Arden Moscati, Ph.D. , Charles Paulding, Ph.D. , Carlo Sidore, Ph.D. , Eli Stahl, Ph.D. , Kyoko Watanabe, Ph.D. , Bin Ye, Ph.D. , Blair Zhang, Ph.D. , Andrey Ziyatdinov, Ph.D.

### **Therapeutic Area Genetics**

Ariane Ayer, B.S. , Aysegul Guvenek, Ph.D. , George Hindy, Ph.D. , Giovanni Coppola, M.D. , Jan Freudenberg, M.D. , Jonas Bovijn M.D. , Julie Horowitz , Ph.D. , Katherine Siminovitch, M.D. , Jonas B. Nielsen, MD, PhD, Kavita Praveen, Ph.D. , Luca A. Lotta, M.D. , Manav Kapoor, Ph.D. , Mary Haas, Ph.D. , Moeen Riaz , Ph.D. , Niek Verweij, Ph.D. , Olukayode Sosina, Ph.D. , Parsa Akbari, Ph.D. , Priyanka Nakka, Ph.D. , Sahar Gelfman, Ph.D. , Sujit Gokhale, B.E. , Tanima De, Ph.D. , Veera Rajagopal, Ph.D. , Alan Shuldiner, M.D. , Bin Ye, Ph.D. , Gannie Tzoneva, Ph.D. , Juan Rodriguez-Flores, Ph.D.

### **RGC Biology**

Shek Man Chim, Ph.D. , Valerio Donato, Ph.D. , Aris Economides, Ph.D. , Daniel Fernandez, M.S., Giusy Della Gatta, Ph.D. , Alessandro Di Gioia, Ph.D. , Kristen Howell, M.S. , Katia Karalis, Ph.D. , Lori Khrimian, Ph.D. , Minhee Kim, Ph.D. , Hector Martinez , Lawrence Miloscio, B.S. , Sheilyn Nunez, B.S. , Elias Pavlopoulos, Ph.D. , Trikaladarshi Persaud, B.S.

### **Research Program Management & Strategic Initiatives**

Esteban Chen, M.S. , Marcus B. Jones, Ph.D. , Michelle G. LeBlanc, Ph.D. , Jason Mighty, Ph.D. , Lyndon J. Mitnaul, Ph.D. , Nirupama Nishtala, Ph.D. , Nadia Rana, Ph.D.

## **The BioBank Japan Project Banner Author List**

Koichi Matsuda. Laboratory of Genome Technology, Human Genome Center, Institute of Medical Science, The University of Tokyo, Tokyo, Japan. Laboratory of Clinical Genome Sequencing, Graduate School of Frontier Sciences, The University of Tokyo, Tokyo, Japan.

Yuji Yamanashi. Division of Genetics, The Institute of Medical Science, The University of Tokyo, Tokyo, Japan.

Yoichi Furukawa. Division of Clinical Genome Research, Institute of Medical Science, The University of Tokyo, Tokyo, Japan.

Takayuki Morisaki. Division of Molecular Pathology IMSUT Hospital, Department of Internal Medicine Project Division of Genomic Medicine and Disease Prevention The Institute of Medical Science The University of Tokyo, Tokyo, Japan.

Yoshinori Murakami. Department of Cancer Biology, Institute of Medical Science, The University of Tokyo, Tokyo, Japan.

Yoichiro Kamatani. Laboratory of Complex Trait Genomics, Graduate School of Frontier Sciences, The University of Tokyo, Tokyo, Japan.

Laboratory of Clinical Genome Sequencing, Graduate School of Frontier Sciences, The University of Tokyo, Tokyo, Japan.

Kaori Muto. Department of Public Policy, Institute of Medical Science, The University of Tokyo, Tokyo, Japan.

Akiko Nagai. Department of Public Policy, Institute of Medical Science, The University of Tokyo, Tokyo, Japan.

Wataru Obara. Department of Urology, Iwate Medical University, Iwate, Japan.

Ken Yamaji. Department of Internal Medicine and Rheumatology, Juntendo University Graduate School of Medicine, Tokyo, Japan.

Kazuhisa Takahashi. Department of Respiratory Medicine, Juntendo University Graduate School of Medicine, Tokyo, Japan.

Satoshi Asai. Division of Pharmacology, Department of Biomedical Science, Nihon University School of Medicine, Tokyo, Japan.

Division of Genomic Epidemiology and Clinical Trials, Clinical Trials Research Center, Nihon University. School of Medicine, Tokyo, Japan.

Yasuo Takahashi. Division of Genomic Epidemiology and Clinical Trials, Clinical Trials Research Center, Nihon University School of Medicine, Tokyo, Japan.

Takao Suzuki. Tokushukai Group, Tokyo, Japan.

Nobuaki Sinozaki. Tokushukai Group, Tokyo, Japan.

Hiroki Yamaguchi. Department of Hematology, Nippon Medical School, Tokyo, Japan.

Shiro Minami. Department of Bioregulation, Nippon Medical School, Kawasaki, Japan.

Shigeo Murayama. Tokyo Metropolitan Geriatric Hospital and Institute of Gerontology, Tokyo, Japan.

Kozo Yoshimori. Fukujuji Hospital, Japan Anti-Tuberculosis Association, Tokyo, Japan.



Satoshi Nagayama. The Cancer Institute Hospital of the Japanese Foundation for Cancer Research, Tokyo, Japan.

Daisuke Obata. Center for Clinical Research and Advanced Medicine, Shiga University of Medical Science, Shiga, Japan.

Masahiko Higashiyama. Department of General Thoracic Surgery, Osaka International Cancer Institute, Osaka, Japan.

Akihide Masumoto. Iizuka hospital, Fukuoka, Japan.

Yukihiro Koretsune. National Hospital Organization Osaka National Hospital, Osaka, Japan.

Yukihide Momozawa. Laboratory for Genotyping Development, RIKEN Center for Integrative Medical Sciences, Yokohama, Japan.

Chikashi Terao. Laboratory for Statistical and Translational Genetics, RIKEN Center for Integrative Medical Sciences, RIKEN, Yokohama, Japan.

Satoshi Koyama. Laboratory for Cardiovascular Genomics and Informatics, RIKEN Center for Integrative Medical Sciences, Yokohama, Japan.

Masato Akiyama. Department of Ophthalmology, Graduate School of Medical Sciences, Kyushu University, Fukuoka, Japan.

Kaoru Ito. Laboratory for Cardiovascular Genomics and Informatics, RIKEN Center for Integrative Medical Sciences, Japan.

Issei Komuro. Department of Cardiovascular Medicine, The University of Tokyo Hospital, Japan.

Kazuo Miyazawa. Laboratory for Cardiovascular Genomics and Informatics, RIKEN Center for Integrative Medical Sciences, Japan.

## **The DBDS Genomic Consortium Banner Author List:**

Steffen Andersen<sup>1</sup>

Karina Banasik<sup>2</sup>

Søren Brunak<sup>2</sup>

Kristoffer Burgdorf<sup>3</sup>

Christian Erikstrup<sup>4</sup>

Thomas Folkmann Hansen<sup>5</sup>

Henrik Hjalgrim<sup>6</sup>

Gregor Jemec<sup>7</sup>

Poul Jennum<sup>8</sup>

Pär Ingemar Johansson<sup>3</sup>

Kasper Rene Nielsen<sup>9</sup>

Mette Nyegaard<sup>10</sup>

Mie Topholm Brun<sup>11</sup>

Ole Birger Pedersen<sup>12</sup>

Susan Mikkelsen<sup>13</sup>

Khoa Manh Dinh<sup>4</sup>

Erik Sørensen<sup>3</sup>

Henrik Ullum<sup>3</sup>

Sisse Rye Ostrowski<sup>3</sup>

Thomas Werge<sup>13</sup>

Daniel Gudbjartsson<sup>14</sup>

Kari Stefansson<sup>14</sup>

Hreinn Stefánsson<sup>14</sup>

Unnur Þorsteinsdóttir<sup>14</sup>

Margit Anita Hørup Larsen<sup>3</sup>

Maria Didriksen<sup>3</sup>

Susanne Sækmose<sup>12</sup>

<sup>1</sup> Department of Finance, Copenhagen Business School, Copenhagen, Denmark

<sup>2</sup> Novo Nordisk Foundation Center for Protein Research, Faculty of Health and Medical Sciences, University of Copenhagen, Copenhagen, Denmark

<sup>3</sup> Department of Clinical Immunology, Copenhagen University Hospital – Rigshospitalet, Copenhagen, Denmark

<sup>4</sup> Department of Clinical Immunology, Aarhus University Hospital, Aarhus, Denmark

<sup>5</sup> Danish Headache Center, Department of Neurology, Rigshospitalet, Glostrup, Denmark

<sup>6</sup> Department of Epidemiology Research, Statens Serum Institut, Copenhagen, Denmark

<sup>7</sup> Department of Clinical Medicine, Zealand University Hospital – Roskilde, Denmark

<sup>8</sup> Department of Clinical Neurophysiology, University of Copenhagen, Copenhagen, Denmark

<sup>9</sup> Department of Clinical Immunology, Aalborg University Hospital, Aalborg, Denmark

<sup>10</sup> Department of Biomedicine, Aarhus University, Denmark

<sup>11</sup> Department of Clinical Immunology, Odense University Hospital, Odense, Denmark

<sup>12</sup> Department of Clinical Immunology, Zealand University Hospital – Køge, Denmark

<sup>13</sup> Institute of Biological Psychiatry Mental Health Centre Sct. Hans Copenhagen University Hospital Roskilde Denmark

<sup>14</sup> deCODE genetics Reykjavik Iceland

## Supplementary References

1. Choi, S. H. *et al.* Sequencing in over 50,000 cases identifies coding and structural variation underlying atrial fibrillation risk. *Nat. Genet.* accepted in principle (NG-A59617R2).
2. Adalsteinsdottir, B. *et al.* Nationwide Study on Hypertrophic Cardiomyopathy in Iceland. *Circulation* **130**, 1158–1167 (2014).
3. Tucker, N. R. *et al.* Transcriptional and cellular diversity of the human heart. *Circulation* **142**, 466–482 (2020).
4. McLaren, W. *et al.* The Ensembl Variant Effect Predictor. *Genome Biology* **17**, 122 (2016).
5. Thorolfsdottir, R. B. *et al.* Coding variants in RPL3L and MYZAP increase risk of atrial fibrillation. *Communications biology* **1**, 68 (2018).
6. Christophersen, I. E. *et al.* Large-scale analyses of common and rare variants identify 12 new loci associated with atrial fibrillation. *Nature Genetics* **49**, 946–952 (2017).
7. Choi, S. H. *et al.* Association Between Titin Loss-of-Function Variants and Early-Onset Atrial Fibrillation. *JAMA* **320**, 2354 (2018).
8. Ellinor, P. T. *et al.* Meta-analysis identifies six new susceptibility loci for atrial fibrillation. *Nature genetics* **44**, 670–5 (2012).
9. Low, S.-K. *et al.* Identification of six new genetic loci associated with atrial fibrillation in the Japanese population. *Nature Genetics* **49**, 953–958 (2017).
10. Nielsen, J. B. *et al.* Biobank-driven genomic discovery yields new insight into atrial fibrillation biology. *Nature Genetics* **50**, 1234–1239 (2018).
11. Choi, E.-K. *et al.* Korean Atrial Fibrillation (AF) Network: Genetic Variants for AF Do Not Predict Ablation Success. *Journal of the American Heart Association* **4**, e002046 (2015).

12. Roselli, C. *et al.* Multi-ethnic genome-wide association study for atrial fibrillation. *Nature Genetics* **50**, 1225–1233 (2018).
13. Pulit, S. L. *et al.* Loci associated with ischaemic stroke and its subtypes (SiGN): a genome-wide association study. *The Lancet Neurology* **15**, 174–184 (2016).
14. Sudlow, C. *et al.* UK Biobank: An Open Access Resource for Identifying the Causes of a Wide Range of Complex Diseases of Middle and Old Age. **12**, e1001779 (2015).
15. Conen, D. *et al.* Genetic and phenotypic determinants of blood pressure and other cardiovascular risk factors (GAPP). *Swiss Med Wkly* **143**, w13728 (2013).
16. Sørensen, E. *et al.* Data Resource Profile: The Copenhagen Hospital Biobank (CHB). *Int J Epidemiol* **50**, 719–720e (2021).
17. Hansen, T. F. *et al.* DBDS Genomic Cohort, a prospective and comprehensive resource for integrative and temporal analysis of genetic, environmental and lifestyle factors affecting health of blood donors. *BMJ Open* **9**, e028401 (2019).
18. Giugliano, R. P. *et al.* Edoxaban versus Warfarin in Patients with Atrial Fibrillation. *New England Journal of Medicine* **369**, 2093–2104 (2013).
19. Kurki, M. I. *et al.* FinnGen provides genetic insights from a well-phenotyped isolated population. *Nature* **613**, 508–518 (2023).
20. Sabatine, M. S. *et al.* Evolocumab and Clinical Outcomes in Patients with Cardiovascular Disease. *New England Journal of Medicine* **376**, 1713–1722 (2017).
21. Sonnegg, A. *et al.* Cohort Profile: the Health and Retirement Study (HRS). *International journal of epidemiology* **43**, 576–85 (2014).

22. Bonaca, M. P. *et al.* Long-Term Use of Ticagrelor in Patients with Prior Myocardial Infarction. *New England Journal of Medicine* **372**, 1791–1800 (2015).
23. Scirica, B. M. *et al.* Saxagliptin and Cardiovascular Outcomes in Patients with Type 2 Diabetes Mellitus. *New England Journal of Medicine* **369**, 1317–1326 (2013).
24. O'Donoghue, M. L. *et al.* Effect of Darapladib on Major Coronary Events After an Acute Coronary Syndrome: The SOLID-TIMI 52 Randomized Clinical Trial. *JAMA* **312**, 1006–1015 (2014).
